# Supplementary material for: Comparative analysis of prostate cancer specific biomarkers PCA3 and ERG in whole urine, urinary sediments and exosomes
Source: publisher site journal article supplement (doi:10.1515/cclm-2015-0599), 2016-02-10
Supplement: Supplementary file 1 [file cclm-2015-0599_Suppl.docx]

**Supplementary Material – Callibration curves: DOI:**[**10.1515/cclm-2015-0599**](http://dx.doi.org/10.1515/cclm-2014-0090)

**KLK3**

|  | **Plate 1** | | **Plate 2** | | **Plate 3** | |  |  |  |  |
| --- | --- | --- | --- | --- | --- | --- | --- | --- | --- | --- |
| **Copies (log)** | **CP** | **copies** | **CP** | **copies** | **CP** | **copies** | **Average (CP)** | **(copies)** | **st dev** | **CV %** |
| 6 | 19,67 | 1186209 | 20,12 | 874441 | 19,80 | 1086184 | 19,86 | 1048945 | 159185 | 15 |
| 5 | 23,32 | 100000 | 23,52 | 87326 | 23,40 | 94723 | 23,41 | 94016 | 6367 | 7 |
| 4 | 26,56 | 11130 | 26,8 | 9459 | 26,79 | 9524 | 26,72 | 10038 | 946 | 9 |
| 3 | 30,22 | 932 | 30,13 | 991 | 30,15 | 977 | 30,17 | 967 | 31 | 3 |
| 2 | 33,72 | 87 | 33,47 | 103 | 34,25 | 61 | 33,81 | 84 | 21 | 26 |
| 1 | 36,26 | 16 | 36,37 | 14 | 36,26 | 16 | 36,30 | 15 | 1 | 4 |


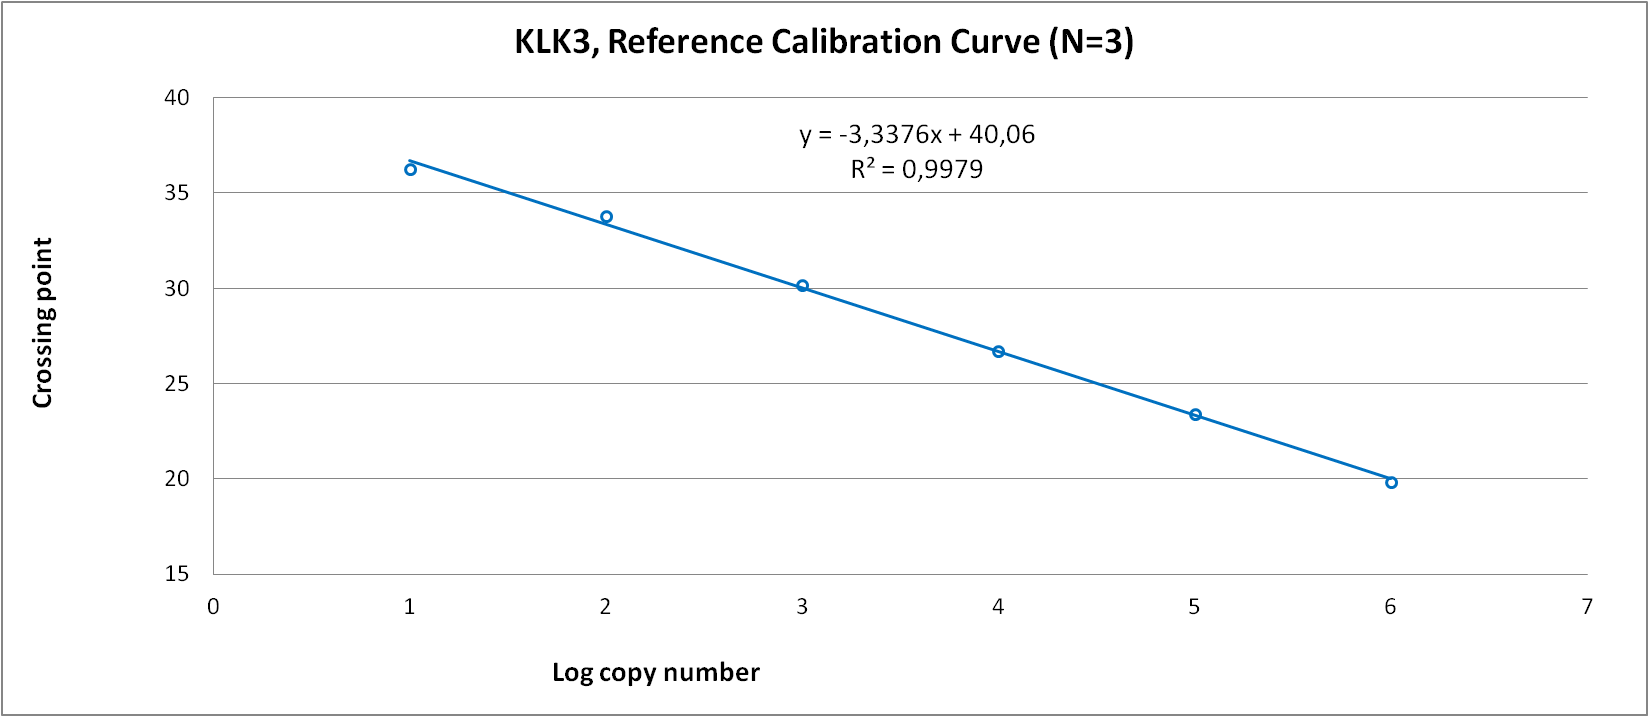


**PCA3**

|  | **Plate 1** | | **Plate 2** | | **Plate 3** | |  |  |  |  |
| --- | --- | --- | --- | --- | --- | --- | --- | --- | --- | --- |
| **Copies (log)** | **CP** | **copies** | **CP** | **copies** | **CP** | **copies** | **Average (CP)** | **(copies)** | **st dev** | **CV %** |
| 6 | 20,53 | 971558 | 20,59 | 934567 | 20,58 | 940633 | 20,57 | 948919 | 19839 | 2 |
| 5 | 23,94 | 106994 | 23,89 | 110512 | 23,91 | 109091 | 23,91 | 108866 | 1770 | 2 |
| 3 | 30,93 | 1162 | 31,01 | 1104 | 31,06 | 1069 | 31,00 | 1112 | 47 | 4 |
| 2 | 35,14 | 76 | 35,16 | 75 | 35,18 | 74 | 35,16 | 75 | 1 | 1 |
| 1 | 38,08 | 11 | 37,81 | 14 | 38,27 | 10 | 38,05 | 12 | 2 | 15 |


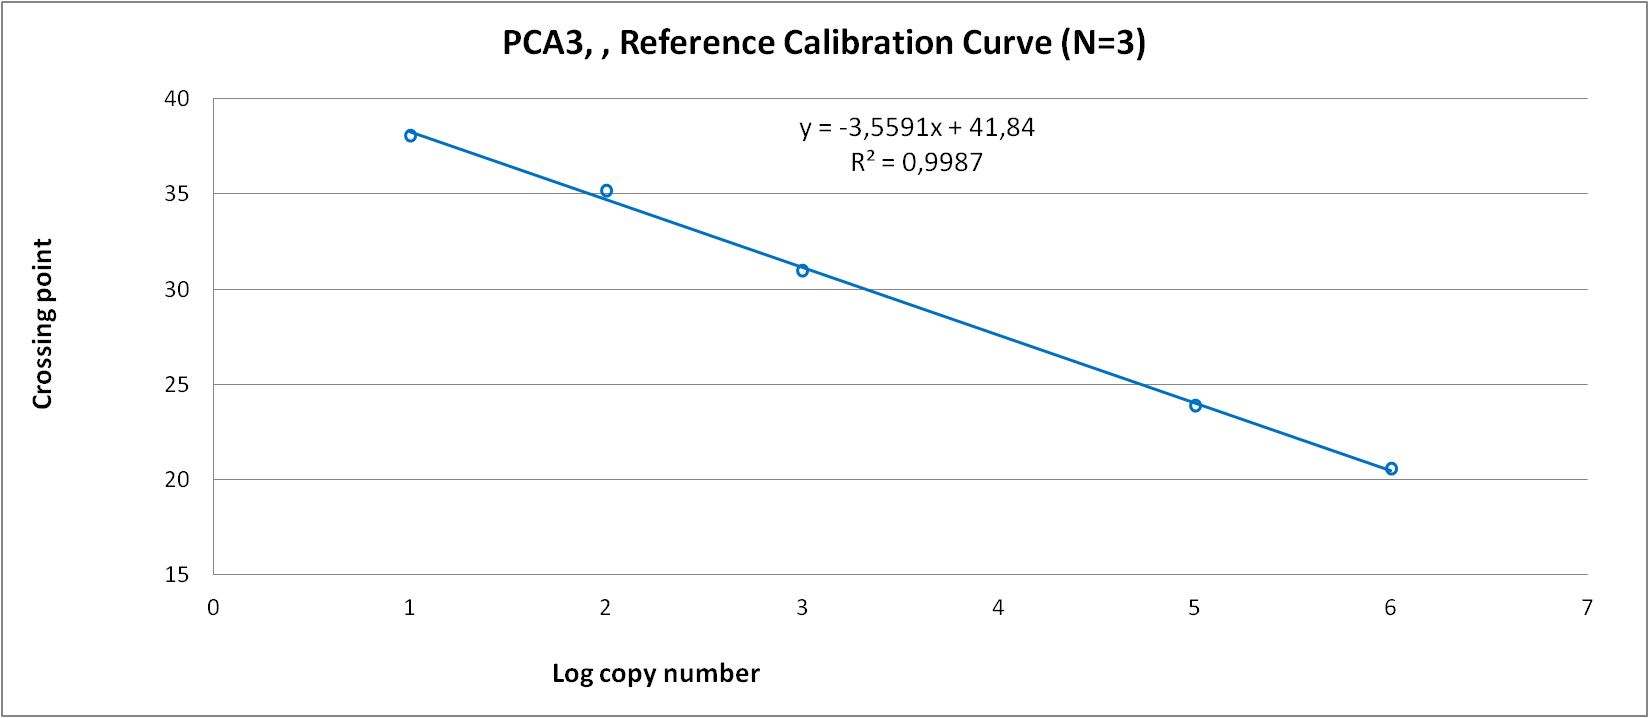


**ERG**

|  | **Plate 1** | | **Plate 2** | | **Plate 3** | |  |  |  |  |
| --- | --- | --- | --- | --- | --- | --- | --- | --- | --- | --- |
| **Copies (log)** | **CP** | **copies** | **CP** | **copies** | **CP** | **copies** | **Average (CP)** | **(copies)** | **st dev** | **CV %** |
| 6 | 18,96 | 1118364 | 19,1 | 1017560 | 19,03 | 1066772 | 19,03 | 1067565 | 50407 | 5 |
| 5 | 22,45 | 106153 | 22,61 | 95290 | 22,60 | 95935 | 22,55 | 99126 | 6094 | 6 |
| 4 | 25,93 | 10144 | 26,06 | 9292 | 26,06 | 9292 | 26,02 | 9576 | 492 | 5 |
| 3 | 29,30 | 1044 | 29,56 | 876 | 29,70 | 797 | 29,52 | 906 | 126 | 14 |
| 2 | 32,63 | 110 | 32,77 | 100 | 32,65 | 109 | 32,68 | 107 | 5 | 5 |
| 1 | 35,84 | 13 | 36,25 | 10 | 36,33 | 9 | 36,14 | 10 | 2 | 18 |


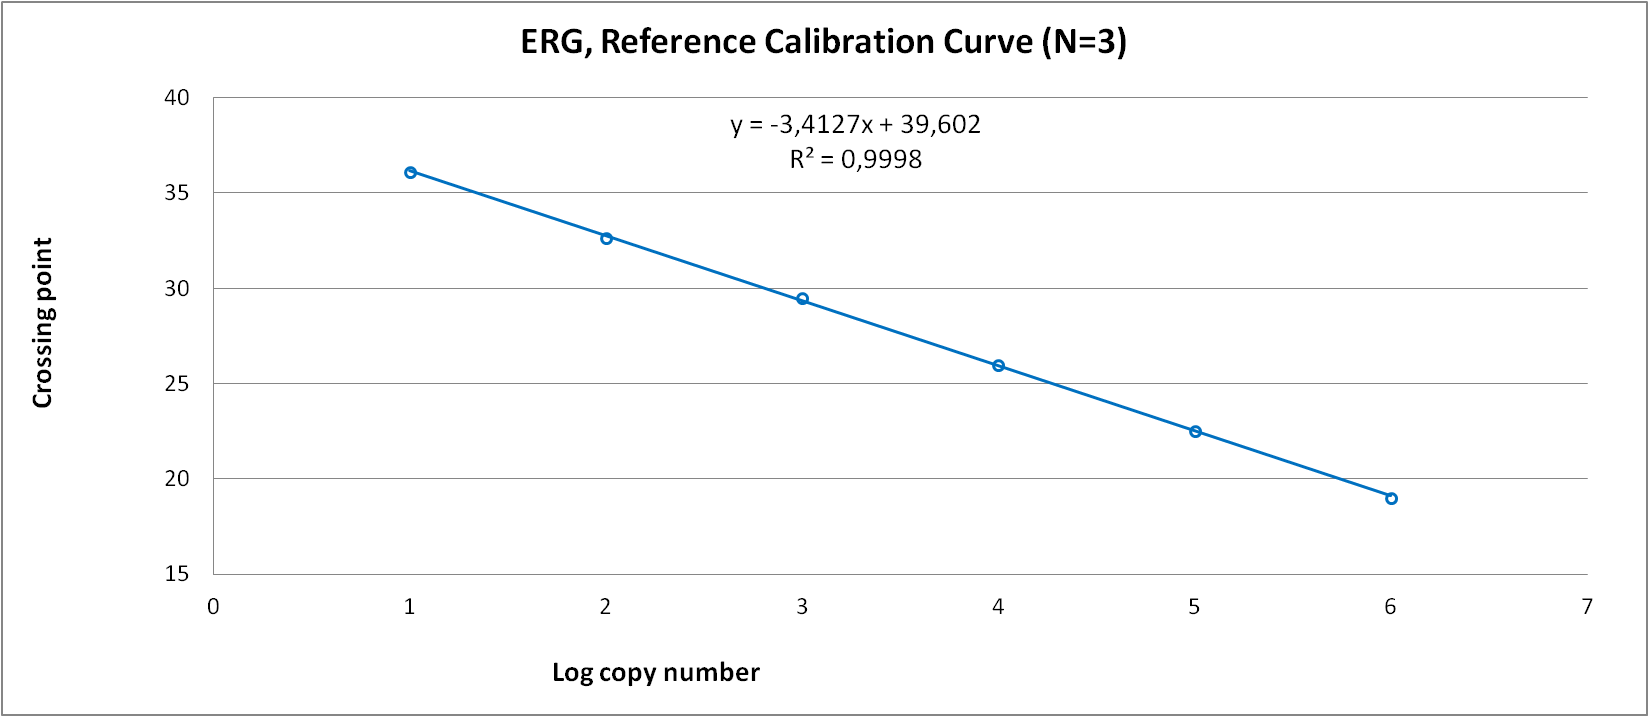


**SUMMARY CALLIBRATION CURVES**

|  |  |  | |  | |
| --- | --- | --- | --- | --- | --- |
| **Gene** | **KLK3** | | **PCA3** | | **ERG** |
| Y-intercept of standard curve | 40.06 | | 41.84 | | 39.60 |
| Slope of standard curve | -3.34 | | -3.56 | | -3.41 |
| PCR efficiency calculated from slope | 99.35 | | 90.97 | | 96.35 |
| Amplification factor | 1.99 | | 1.91 | | 1.96 |
| r2 of standard curve | 0.9979 | | 0.9987 | | 0.9998 |
| Linear dynamic range | 10-1E6 copies | | 10-1E6 copies | | 10-1E6 copies |
| Cq variation at lower limit | 4% | | 15% | | 18% |
